# Supplementary material
Source: PubMed Central journal article supplement (PMC2544580)
Supplement: 0806993105_0806993105SI.pdf [file 0806993105_0806993105SI.pdf]

# Supporting Information

Yu et al. 10.1073/pnas.0806993105

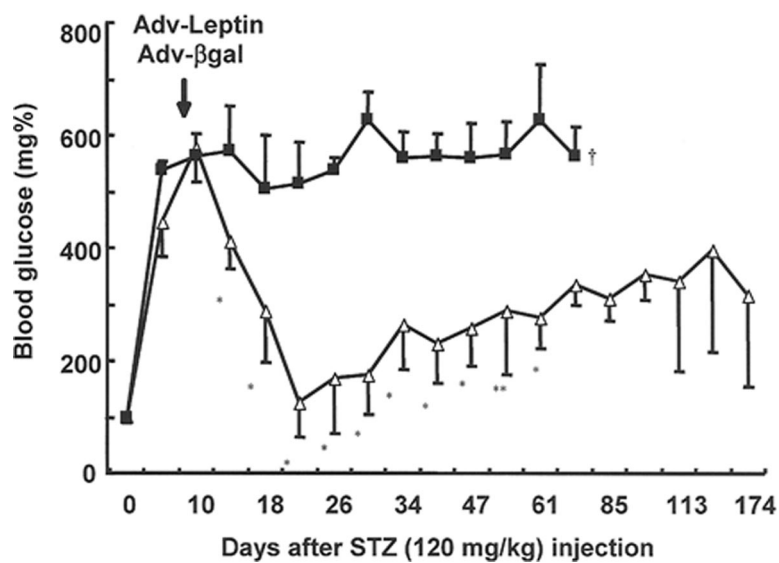

**Fig. S1.** A long-term study showing a gradual return of hyperglycemia that nevertheless remains below pretreatment levels. The animals retained body weight and appeared to be in normal health. (■ = Adv-leptin; △ = Adv-βgal; \*,  $P < 0.01$ ; \*\*,  $P < 0.05$ ).

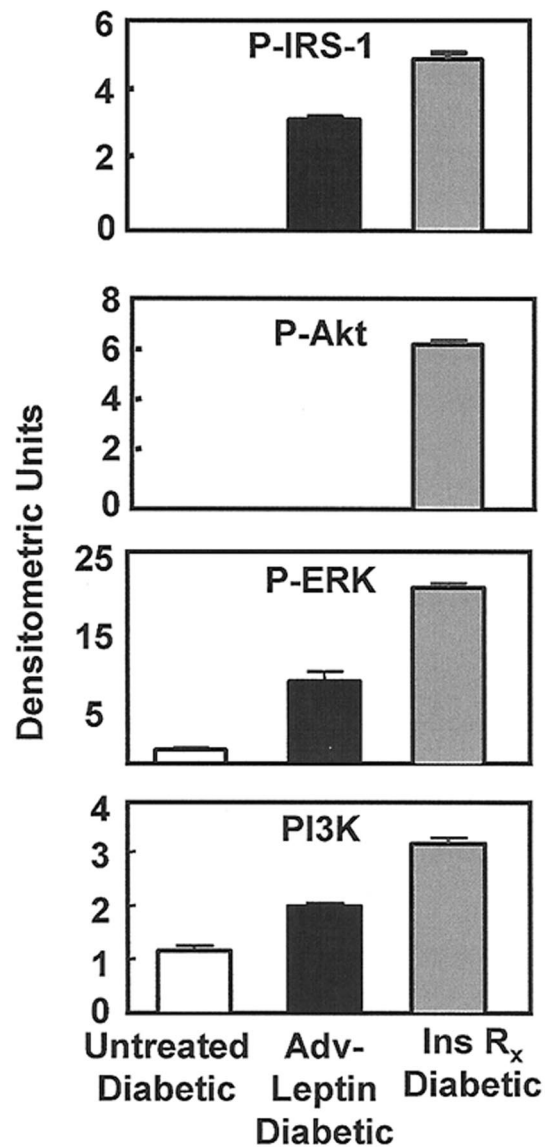

**Fig. S2.** Hyperleptinemia increases activation of certain components of the insulin signaling pathway in skeletal muscle. Immunoblotting for phosphoproteins of the insulin signaling transduction pathway in skeletal muscle of double-dose STZ-diabetic rats. Rats were untreated ( $\square$ ) ( $n = 4$ ), or they received Adv-leptin 3 days earlier ( $\blacksquare$ ) ( $n = 5$ ) or insulin 3 h earlier ( $\blacksquare$ ) ( $n = 3$ ). Results are expressed as densitometric units.

**Table S1. Metabolic profiles of untreated STZ and Adv-leptin-treated STZ rats, and nondiabetic (nd) controls 30 days after time of treatment ( $n = 6$ )**

| Measurement          | Untreated   | Adv-leptin | nd        | <i>P</i> value<br>(untreated vs. Adv-leptin) | <i>P</i> value<br>(Adv-leptin vs. lean) |
|----------------------|-------------|------------|-----------|----------------------------------------------|-----------------------------------------|
| Blood glucose, mg/dl | 678 ± 17    | 99 ± 57.4  | 74 ± 6    | 0.001                                        | 0.18                                    |
| Urine glucose, mg/dl | 1,000–2,000 | negative   | negative  |                                              |                                         |
| Insulin, ng/ml       | 0           | 0          | 1.4 ± 0.1 |                                              |                                         |
| Leptin, ng/ml        | 0.02 ± 0.02 | 20.4 ± 5.9 | 1.7 ± 0.5 | 0.006                                        | 0.008                                   |
| TAG, mg/dl           | 1,062 ± 236 | 9 ± 2      | 50 ± 12   | 0.011                                        | 0.02                                    |
| FFA, mEq/ml          | 2.2 ± 1.2   | 0.19 ± 0.1 | 0.3 ± 0.2 | 0.04                                         | 0.42                                    |
| Liver TAG, mg/g      | 1.1 ± 0.5   | 4.7 ± 0.8  | 6.8 ± 0.8 | 0.003                                        | 0.02                                    |
| Muscle TAG, mg/g     | 0.3 ± 0.1   | 1.6 ± 0.3  | 3.4 ± 1.1 | 0.02                                         | 0.04                                    |

**Table S2. Primer sequences used for real-time RT-PCR**

| Gene                | Forward                | Reverse                 |
|---------------------|------------------------|-------------------------|
| Rat AKT-1           | GGCCACTGGCCGCTATT      | GCGACTTCATCCTTTGCAATG   |
| Rat IGF-1           | ATTCATTTGCGTTTGAAAA    | CAGACCCAGCACGAAAGAA     |
| Rat PEPCK           | GCCTGTGGAAAACCAACCT    | CACCCACACATTCAACTTCCA   |
| Rat PGC-1           | CAGCCAGTACAGCCCTGATGA  | TGGTAAGCGCAGCCAAGAG     |
| Rat preproinsulin   | TTTGTCAAACAGCACCTTTGTG | GGGTGTGTAGAAGAAACCACGTT |
| Mouse preproinsulin | GGGGAGCGTGGCTTCTTA     | GGGACAGAATTCAGTGGCA     |
